# Supplementary material
Source: ML conference proceedings conference paper supplement (https://proceedings.mlr.press/v54/mcmahan17a.html)
Supplement: Supplementary file [file mcmahan17a-supp.pdf]

**A Supplemental Figures and Tables**

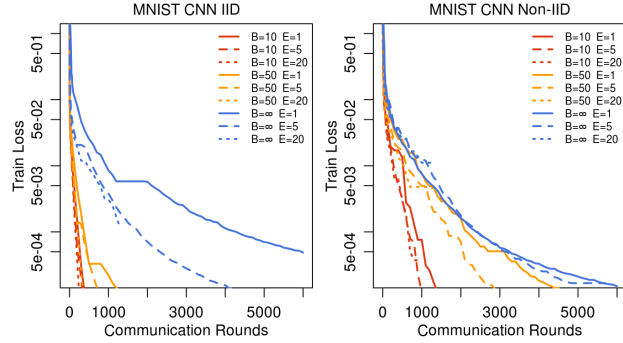

Figure 6: Training set convergence for the MNIST CNN. Note the  $y$ -axis is on a log scale, and the  $x$ -axis covers more training than Figure 2. These plots fix  $C = 0.1$ .

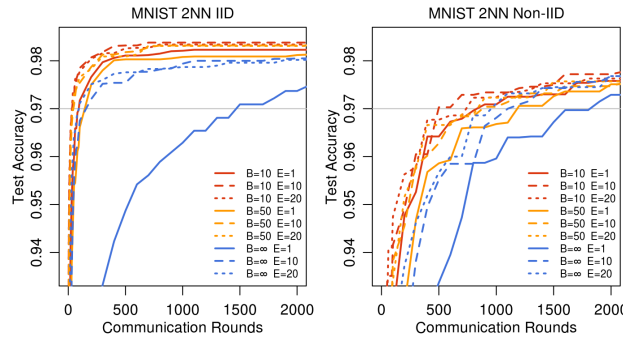

Figure 7: Test set accuracy vs. communication rounds for MNIST 2NN with  $C = 0.1$  and optimized  $\eta$ . The left column is the IID dataset, and right is the pathological 2-digits-per-client non-IID data.

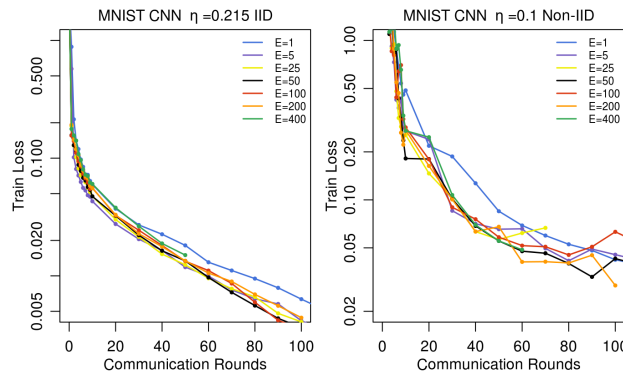

Figure 8: The effect of training for many local epochs (large  $E$ ) between averaging steps, fixing  $B = 10$  and  $C = 0.1$ . Training loss for the MNIST CNN. Note different learning rates and  $y$ -axis scales are used due to the difficulty of our pathological non-IID MNIST dataset.

Table 4: Speedups in the number of communication rounds to reach a target accuracy of 97% for FedAvg, versus FedSGD (first row) on the MNIST 2NN model.

| MNIST 2NN | $E$ | $B$      | $u$  | IID                  | NON-IID              |
|-----------|-----|----------|------|----------------------|----------------------|
| FEDSGD    | 1   | $\infty$ | 1    | 1468                 | 1817                 |
| FEDAVG    | 10  | $\infty$ | 10   | 156 (9.4 $\times$ )  | 1100 (1.7 $\times$ ) |
| FEDAVG    | 1   | 50       | 12   | 144 (10.2 $\times$ ) | 1183 (1.5 $\times$ ) |
| FEDAVG    | 20  | $\infty$ | 20   | 92 (16.0 $\times$ )  | 957 (1.9 $\times$ )  |
| FEDAVG    | 1   | 10       | 60   | 92 (16.0 $\times$ )  | 831 (2.2 $\times$ )  |
| FEDAVG    | 10  | 50       | 120  | 45 (32.6 $\times$ )  | 881 (2.1 $\times$ )  |
| FEDAVG    | 20  | 50       | 240  | 39 (37.6 $\times$ )  | 835 (2.2 $\times$ )  |
| FEDAVG    | 10  | 10       | 600  | 34 (43.2 $\times$ )  | 497 (3.7 $\times$ )  |
| FEDAVG    | 20  | 10       | 1200 | 32 (45.9 $\times$ )  | 738 (2.5 $\times$ )  |

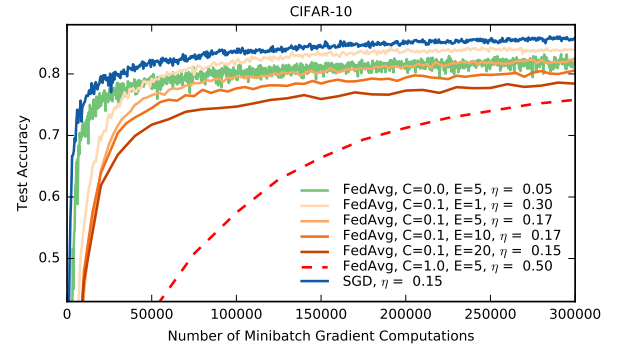

Figure 9: Test accuracy versus number of minibatch gradient computations ( $B = 50$ ). The baseline is standard sequential SGD, as compared to FedAvg with different client fractions  $C$  (recall  $C = 0$  means one client per round), and different numbers of local epochs  $E$ .

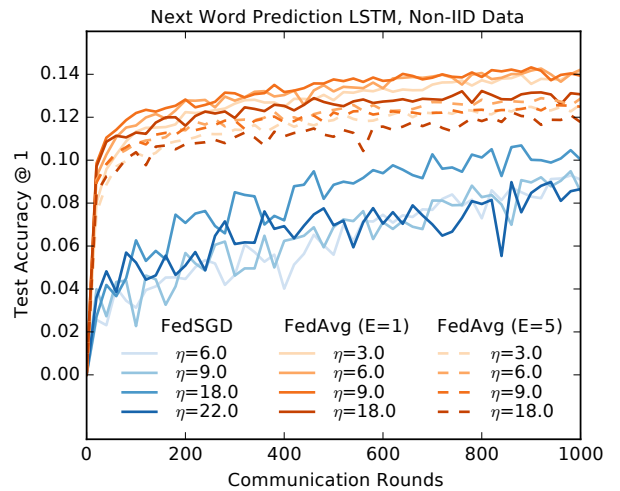

Figure 10: Learning curves for the large-scale language model word LSTM, with evaluation computed every 20 rounds. FedAvg actually performs better with fewer local epochs  $E$  (1 vs 5), and also has lower variance in accuracy across evaluation rounds compared to FedSGD.
